# Supplementary material for: Facile synthesis of spinel Cu1.5Mn1.5O4 microspheres with high activity for the catalytic combustion of diesel soot
Source: Royal Society of Chemistry journal article supplement (doi:10.1039/c7ra01971h), 2017-01-01
Supplement: c7ra01971h1.pdf [file c7ra01971h1.pdf]

## Supporting Information

### **Facile synthesis of spinel $\text{Cu}_{1.5}\text{Mn}_{1.5}\text{O}_4$ microspheres with high activity for the catalytic combustion of diesel soot**

H. Zhao,<sup>ab</sup> X. X. Zhou,<sup>a</sup> L. Y. Pan,<sup>ab</sup> M. Wang,<sup>ab</sup> H. R. Chen,<sup>\*ac</sup> and J. L. Shi<sup>ac</sup>

*<sup>a</sup> State Key Laboratory of High Performance Ceramics and Superfine Microstructures, Shanghai Institute of Ceramics, Chinese Academy of Sciences, 1295 Dingxi Road, Shanghai 200050, China.*

*<sup>b</sup> University of Chinese Academy of Sciences, Beijing, 100049, P. R. China.*

*<sup>c</sup> Jiangsu National Synergetic Innovation Center for Advanced Materials (SICAM), Jiangsu, China.*

\* Corresponding Author: Hangrong Chen (*Email address*: hrchen@mail.sic.ac.cn)

### **Experimental**

To investigate the effect of residual Na on catalytic activity, three additional reference catalysts with different Na content have been prepared for further comparison:  $\text{Cu1Mn1-NR}$  (Non-Rinsed) was obtained through the same procedure with  $\text{Cu1Mn1}$ , except that no rinse was applied;  $\text{Na/Cu1Mn1}$  sample was prepared by impregnating certain amounts of  $\text{NaNO}_3$  onto  $\text{Cu1Mn1}$  (result in 10 wt % Na); and  $\text{Cu1Mn1-NH}_3$  was obtained by the following procedure: Ammonia water containing 60 mmol of  $\text{NH}_3\cdot\text{H}_2\text{O}$  was quickly adding into 55 mL of solution containing 3.75 mmol of  $\text{Cu}(\text{NO}_3)_2\cdot 3\text{H}_2\text{O}$  and 3.75 mmol of  $\text{Mn}(\text{NO}_3)_2$ , which was kept under stirring at 95 °C. After 30 min of reaction, the mixture was cooled to room temperature, then the precursor was centrifuged and dried at 100 °C overnight. Next, the as-prepared samples were grinded and then calcined under static air at 500 °C for 2 h with a heating rate of 1 °C/min.

**Table S1** Characteristic temperatures ( $T_i$ ,  $T_m$  and  $T_f$ ) and selectivity to  $\text{CO}_2$  for catalytic soot combustion over different  $\text{Cu}_x\text{Mn}_y$  mixed oxides and references  $\text{CuO}$  and  $\text{MnO}_\delta$  under loose contact mode. [Reaction condition: 350 ppm  $\text{NO}$  + 10%  $\text{O}_2$  in balance  $\text{N}_2$  with a total flow of 200 mL/min, the space velocity is  $120\,000\text{ mL}\cdot\text{g}^{-1}\cdot\text{h}^{-1}$ , the mass of soot-catalyst-silica is 10-100-1000 mg]

| Sample                   | $T_i$ ( $^\circ\text{C}$ ) | $T_m$ ( $^\circ\text{C}$ ) | $T_f$ ( $^\circ\text{C}$ ) | $S_{\text{CO}_2}$ (%) |
|--------------------------|----------------------------|----------------------------|----------------------------|-----------------------|
| Pure soot                | 424                        | 560                        | 606                        | 58.6                  |
| $\text{CuO}$             | 319                        | 352                        | 392                        | 93.6                  |
| $\text{Cu}_2\text{Mn}_1$ | 311                        | 358                        | 399                        | 92.4                  |
| $\text{Cu}_1\text{Mn}_1$ | 299                        | 330                        | 360                        | 91.9                  |
| $\text{Cu}_1\text{Mn}_2$ | 331                        | 386                        | 435                        | 94.9                  |
| $\text{MnO}_\delta$      | 276                        | 344                        | 441                        | 94.4                  |

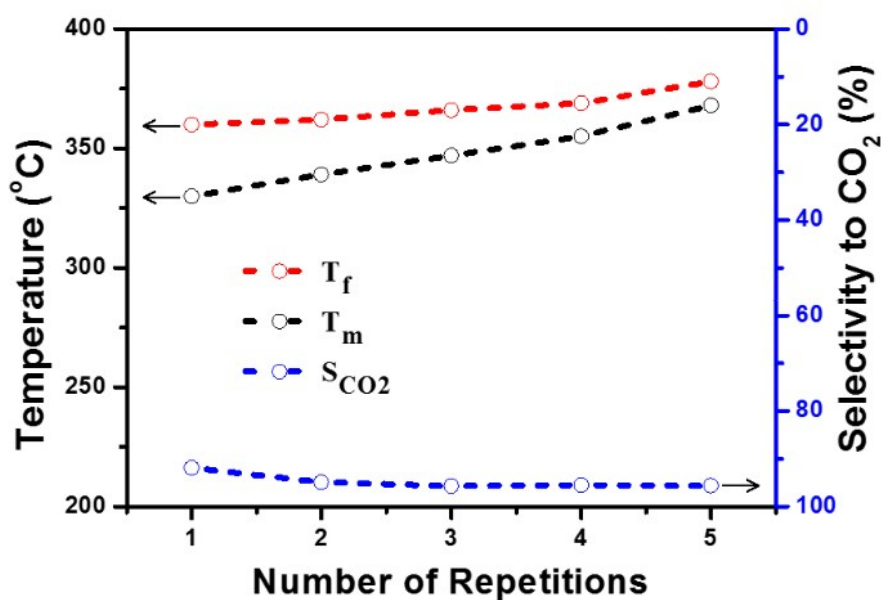

**Fig. S1** Characteristic temperatures ( $T_f$  and  $T_m$ ) and selectivity to  $\text{CO}_2$  ( $S_{\text{CO}_2}$ ) for cyclic soot combustion tests over  $\text{CuMnO(K)}$  and  $\text{CuMnO}$ . (Reaction conditions: 350 ppm  $\text{NO}$  and 10%  $\text{O}_2$  in  $\text{N}_2$  with a total flow of 200 mL/min, mass of soot-catalyst-silica is 10-100-1000 mg)

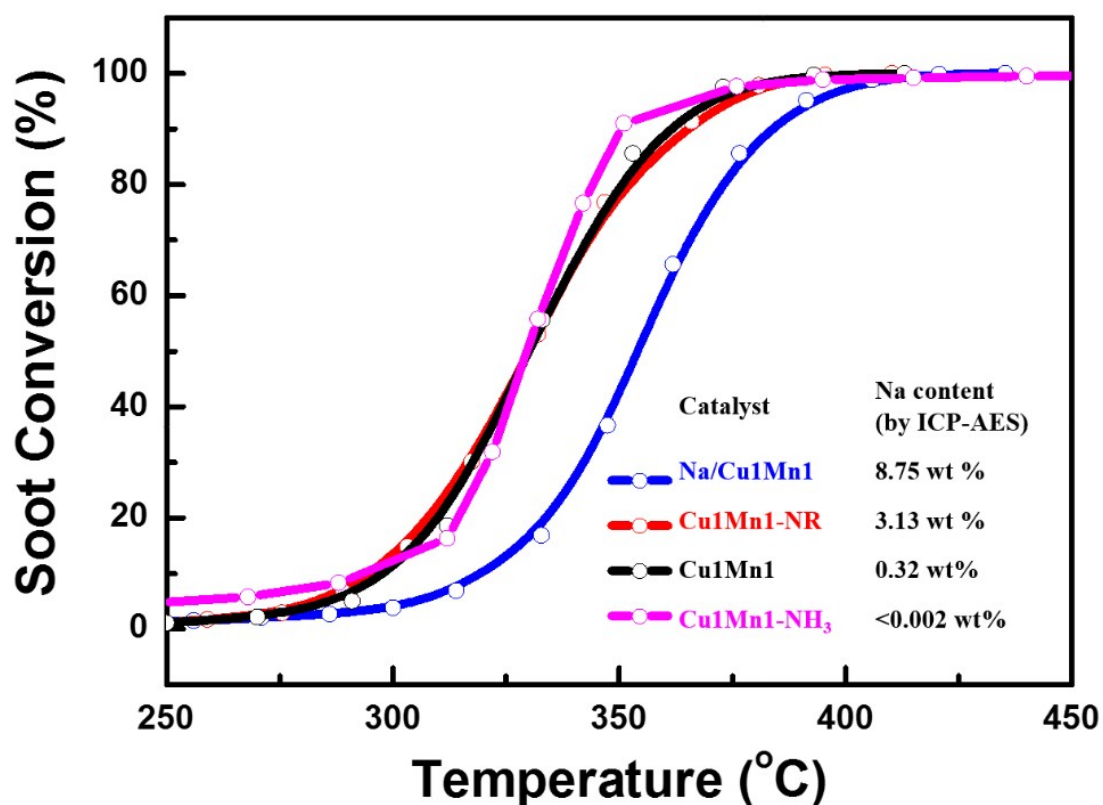

**Fig. S2** Catalytic soot combustion over four different catalysts as indicated with different Na contents. (Preparation procedures for these samples are shown in the Experimental section in SI.) (Reaction conditions: 350 ppm NO and 10% O<sub>2</sub> in N<sub>2</sub> with a total flow of 200 mL/min, mass of soot-catalyst-silica is 10-100-1000 mg)

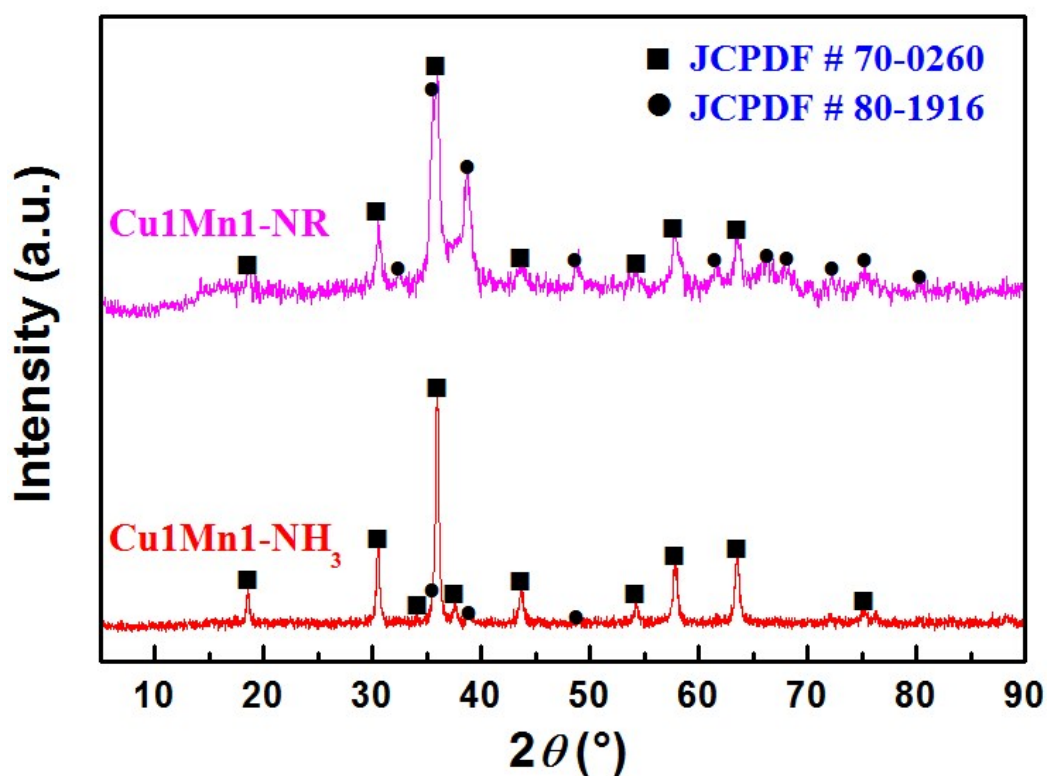

**Fig. S3** XRD patterns of Cu1Mn1-NR and Cu1Mn1-NH<sub>3</sub>. (■: Cu<sub>1.5</sub>Mn<sub>1.5</sub>O<sub>4</sub>, ●: CuO)

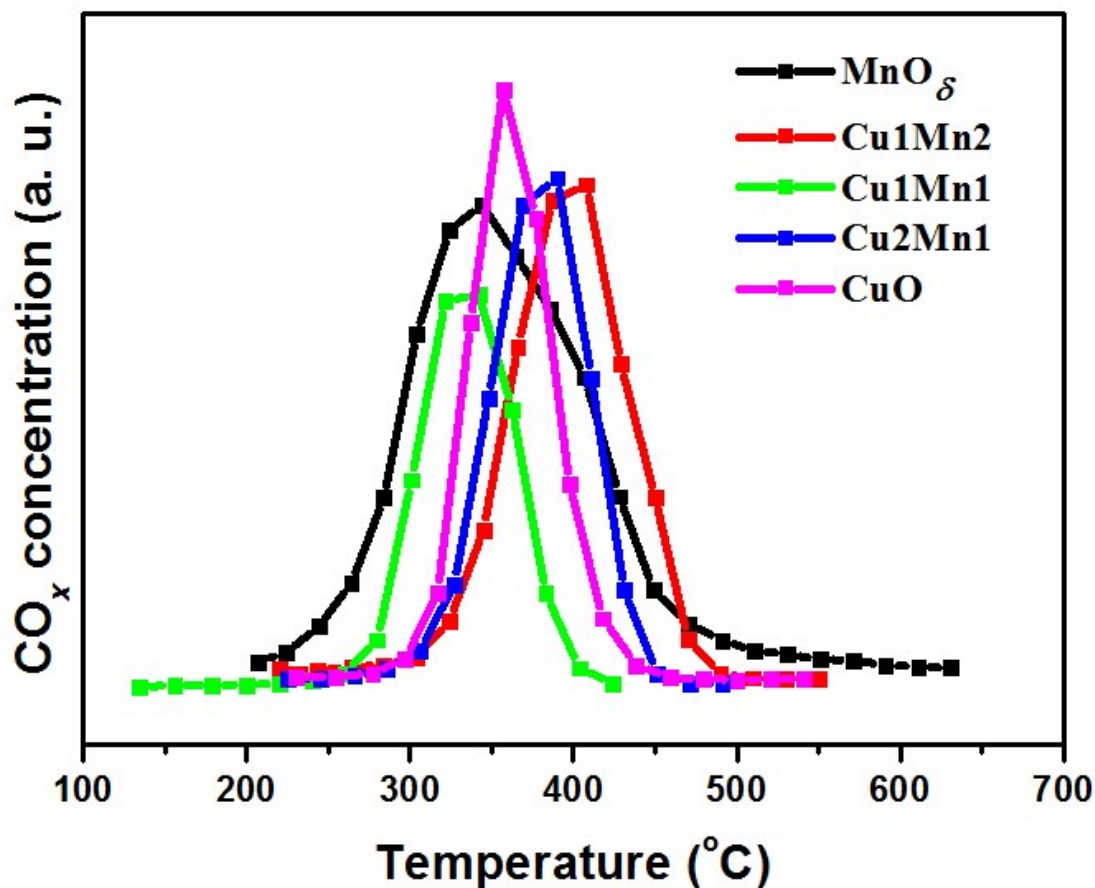

**Fig. S4** Soot combustion performance with different catalysts under loose contact mode. (Reaction conditions: 350 ppm NO and 10% O<sub>2</sub> in N<sub>2</sub> with a total flow of 200 mL/min, mass of soot-catalyst-silica is 10-100-1000 mg)

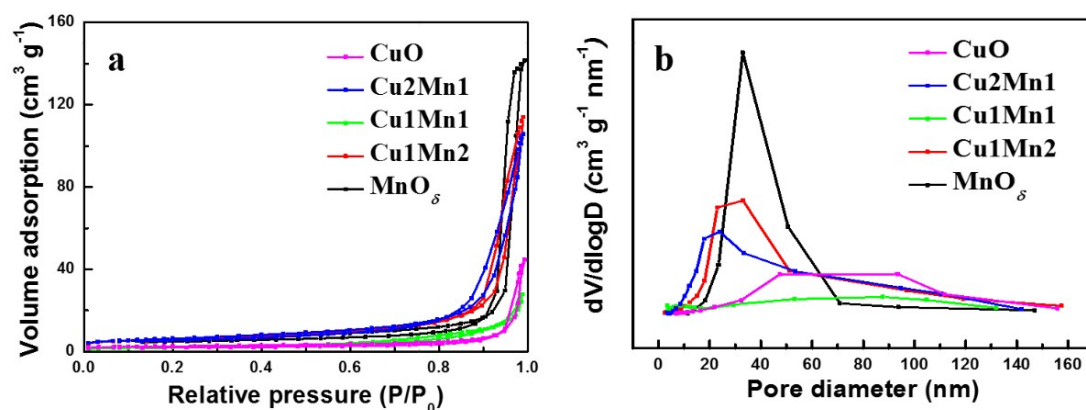

**Fig. S5** (a) N<sub>2</sub> adsorption/desorption isotherms and (b) the corresponding pore size distributions of the different Cu<sub>x</sub>Mn<sub>y</sub> mixed oxides and references CuO and MnO<sub>δ</sub>.

**Table S2** The specific surface areas, pore volumes and average pore diameters of different  $\text{Cu}_x\text{Mn}_y$  mixed oxides and references  $\text{CuO}$  and  $\text{MnO}_\delta$ .

| Catalyst                        | $S_{\text{BET}}$ ( $\text{m}^2 \cdot \text{g}^{-1}$ ) <sup>a</sup> | $V_{\text{BJH}}$ ( $\text{cm}^3 \cdot \text{g}^{-1}$ ) <sup>b</sup> | $D_p$ (nm) <sup>a</sup> |
|---------------------------------|--------------------------------------------------------------------|---------------------------------------------------------------------|-------------------------|
| CuO                             | 9                                                                  | 0.07                                                                | 10-156                  |
| Cu <sub>2</sub> Mn <sub>1</sub> | 22                                                                 | 0.16                                                                | 10-143                  |
| Cu <sub>1</sub> Mn <sub>1</sub> | 8                                                                  | 0.04                                                                | 10-132                  |
| Cu <sub>1</sub> Mn <sub>2</sub> | 22                                                                 | 0.18                                                                | 28                      |
| MnO <sub>δ</sub>                | 21                                                                 | 0.22                                                                | 33                      |

<sup>a</sup>Determined by BET method.

<sup>b</sup>Determined by BJH method.

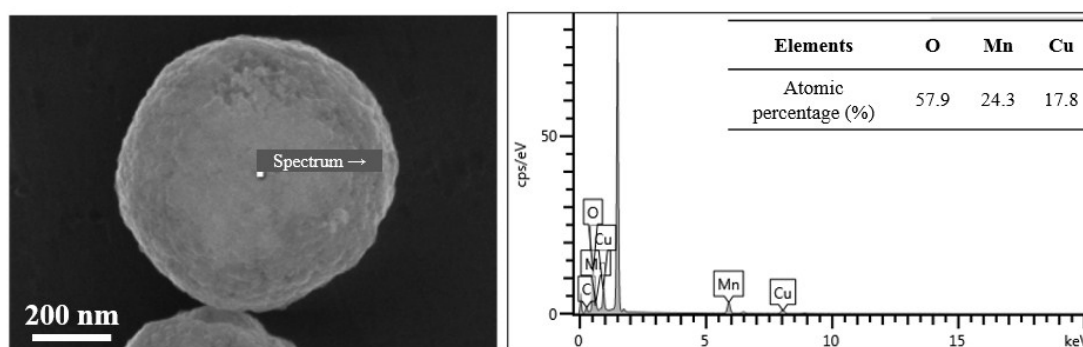

**Fig. S6** The typical SEM image and corresponding EDS spectrum of Cu<sub>1</sub>Mn<sub>2</sub>.

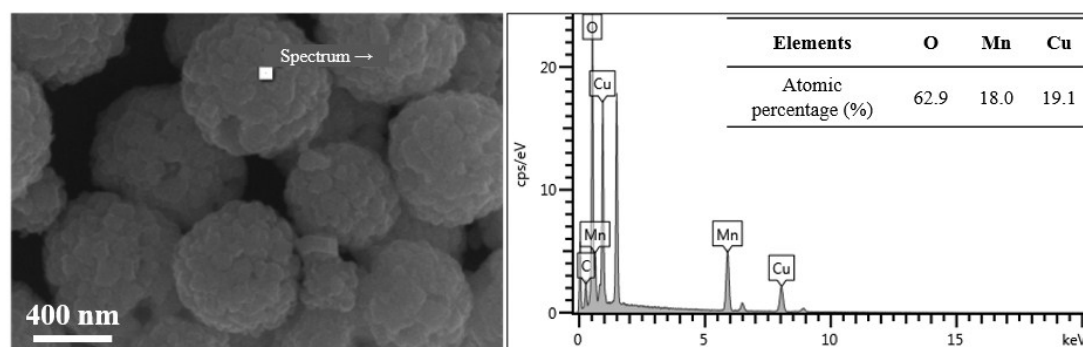

**Fig. S7** The typical SEM image and corresponding EDS spectrum of Cu<sub>1</sub>Mn<sub>1</sub>.

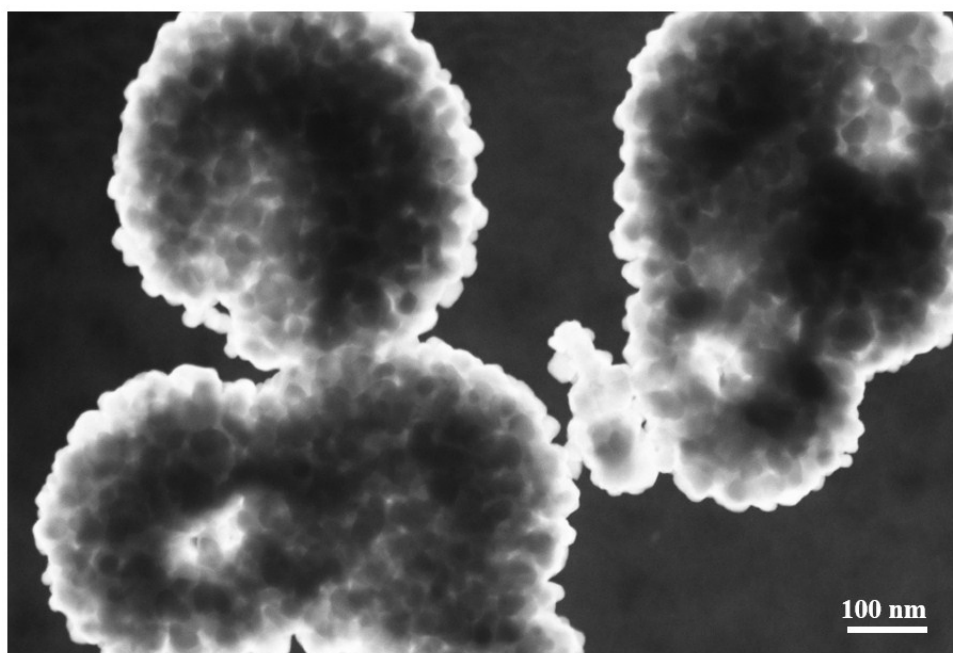

Fig. S8 The typical STEM image of Cu1Mn1.

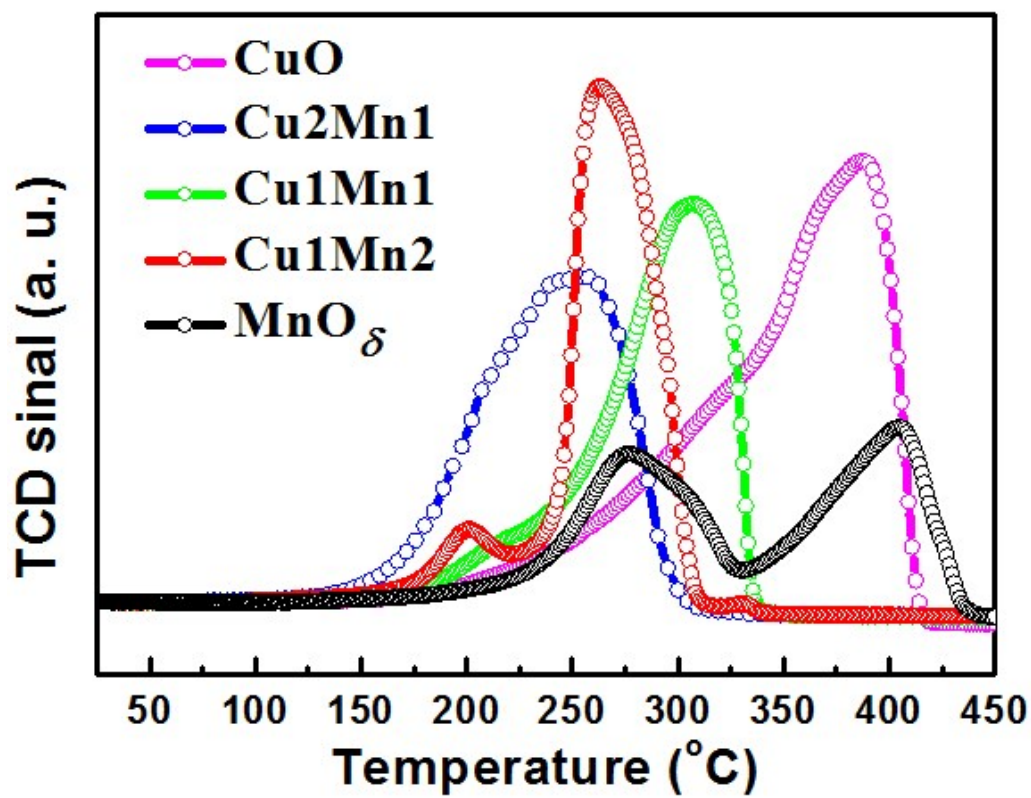

Fig. S9 H<sub>2</sub>-TPR curves of different catalysts as indicated.

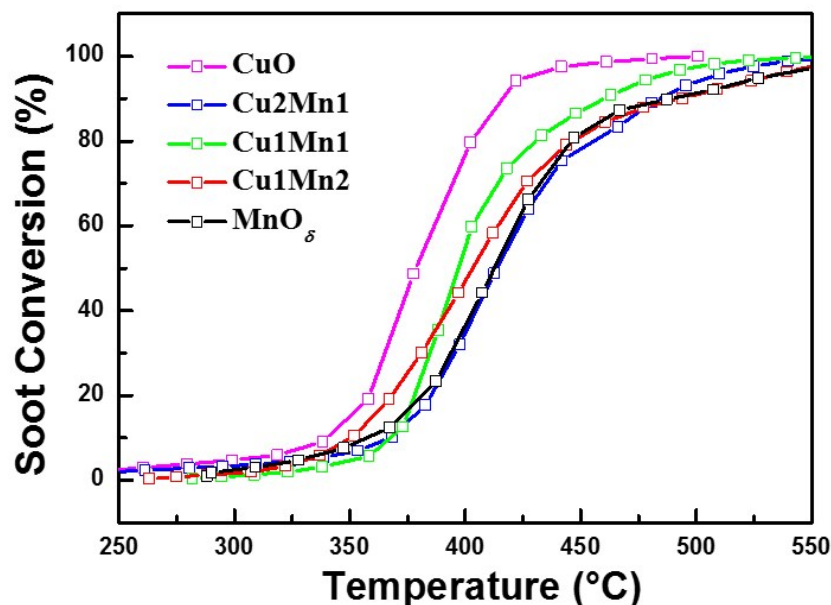

**Fig. S10** Catalytic soot oxidation in  $O_2/N_2$  under loose contact mode over different  $Cu_xMn_y$  mixed oxides and references  $CuO$  and  $MnO_\delta$ . (Reaction condition: 10%  $O_2$  in balance  $N_2$  with a total flow of 200 mL/min, the space velocity is  $120\,000\text{ mL}\cdot\text{g}^{-1}\cdot\text{h}^{-1}$ , the mass of soot-catalyst-silica is 10-100-1000 mg)

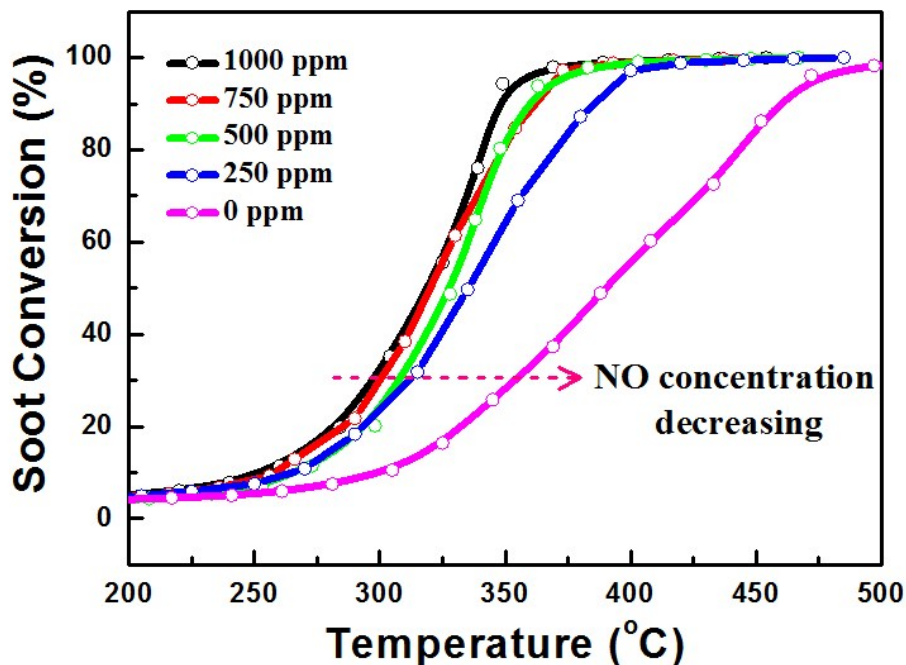

**Fig. S11** The effect of  $NO_x$  concentration on catalytic soot combustion activity. (Reaction condition: 10%  $O_2$  in balance  $N_2$  with a total flow of 200 mL/min,  $NO$  concentrations are set as indicated above, the space velocity is  $120\,000\text{ mL}\cdot\text{g}^{-1}\cdot\text{h}^{-1}$ , the mass of soot-catalyst-silica is 10-100-1000 mg)

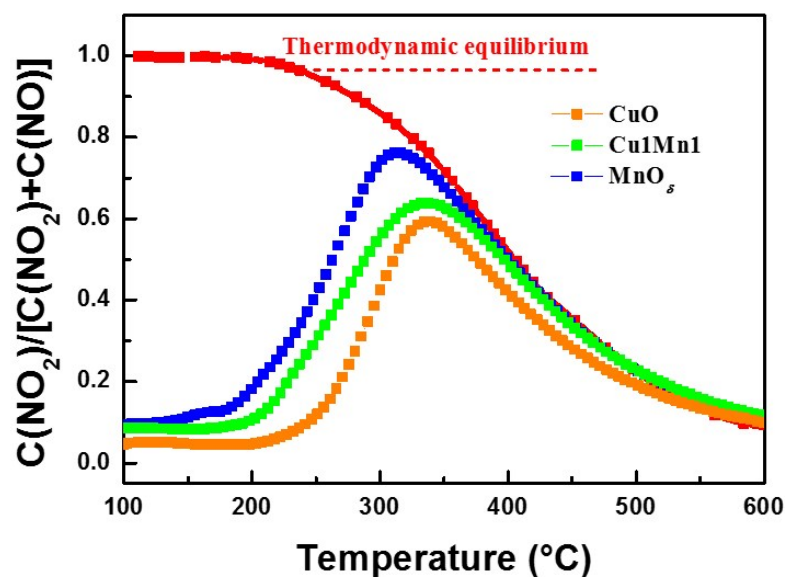

**Fig. S12** Catalytic NO oxidation over CuO, Cu1Mn1 and MnO<sub>δ</sub>. Thermodynamic equilibrium profile is also shown for reference. [Reaction condition: 350 ppm NO + 10% O<sub>2</sub> in balance N<sub>2</sub> with a total flow of 200 mL/min, the space velocity is 120 000 mL·g<sup>-1</sup>·h<sup>-1</sup>]

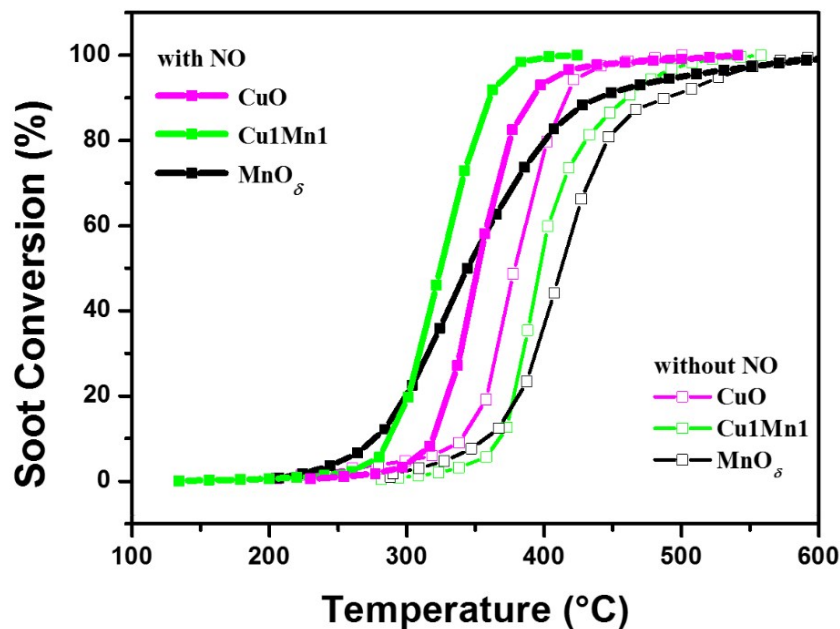

**Fig. S13** Catalytic soot combustion over CuO, Cu1Mn1 and MnO<sub>δ</sub> with or without NO. [Reaction conditions: (350 ppm NO +) 10% O<sub>2</sub> in balance N<sub>2</sub> with a total flow of 200 mL/min, the space velocity is 120 000 mL·g<sup>-1</sup>·h<sup>-1</sup>, mass of soot-catalyst-silica is 10-100-1000 mg]
